# Supplementary material for: The effect of health benefits on climate change mitigation policies
Source: Springer Nature journal article supplement (doi:10.1007/s10584-014-1204-2), 2014-07-29
Supplement: MOESM1 [file 10584_2014_1204_MOESM1_ESM_errrata.pdf]

|      | USA    | EUR    | JPN    | AUS    | FSU    | CHN    | IND    | SEA    | LAM    | MEN    | AFR    |
|------|--------|--------|--------|--------|--------|--------|--------|--------|--------|--------|--------|
| 2005 | 0.0206 | 0.0067 | 0.0034 | 0.1150 | 0.1573 | 0.8588 | 0.5090 | 0.2210 | 0.2366 | 0.1639 | 0.3702 |
| 2010 | 0.0184 | 0.0060 | 0.0034 | 0.1014 | 0.1361 | 0.6960 | 0.4876 | 0.2117 | 0.2069 | 0.1323 | 0.3145 |
| 2015 | 0.0181 | 0.0058 | 0.0033 | 0.0942 | 0.1298 | 0.6087 | 0.5020 | 0.2180 | 0.1934 | 0.1131 | 0.2808 |
| 2020 | 0.0187 | 0.0059 | 0.0032 | 0.0925 | 0.1346 | 0.5316 | 0.5060 | 0.2197 | 0.1840 | 0.0986 | 0.2908 |
| 2025 | 0.0179 | 0.0055 | 0.0032 | 0.0837 | 0.1177 | 0.4003 | 0.4382 | 0.1903 | 0.1560 | 0.0765 | 0.2871 |
| 2030 | 0.0196 | 0.0061 | 0.0031 | 0.0931 | 0.1170 | 0.3011 | 0.3389 | 0.1472 | 0.1207 | 0.0558 | 0.2269 |
| 2035 | 0.0206 | 0.0064 | 0.0030 | 0.0981 | 0.1134 | 0.2064 | 0.2392 | 0.1038 | 0.0845 | 0.0376 | 0.1658 |
| 2040 | 0.0216 | 0.0067 | 0.0029 | 0.1033 | 0.1122 | 0.1454 | 0.1736 | 0.0754 | 0.0604 | 0.0263 | 0.1253 |
| 2045 | 0.0219 | 0.0067 | 0.0028 | 0.1041 | 0.1079 | 0.1083 | 0.1332 | 0.0578 | 0.0456 | 0.0194 | 0.1002 |
| 2050 | 0.0213 | 0.0065 | 0.0027 | 0.1006 | 0.1008 | 0.0838 | 0.1063 | 0.0462 | 0.0356 | 0.0150 | 0.0834 |
| 2055 | 0.0204 | 0.0060 | 0.0025 | 0.0964 | 0.0833 | 0.0607 | 0.0735 | 0.0319 | 0.0250 | 0.0119 | 0.0629 |
| 2060 | 0.0185 | 0.0053 | 0.0024 | 0.0875 | 0.0671 | 0.0449 | 0.0513 | 0.0223 | 0.0178 | 0.0096 | 0.0483 |
| 2065 | 0.0172 | 0.0048 | 0.0023 | 0.0810 | 0.0561 | 0.0357 | 0.0380 | 0.0165 | 0.0134 | 0.0082 | 0.0397 |
| 2070 | 0.0151 | 0.0041 | 0.0021 | 0.0710 | 0.0450 | 0.0278 | 0.0274 | 0.0119 | 0.0099 | 0.0068 | 0.0319 |
| 2075 | 0.0142 | 0.0038 | 0.0020 | 0.0666 | 0.0392 | 0.0239 | 0.0216 | 0.0094 | 0.0080 | 0.0062 | 0.0283 |
| 2080 | 0.0125 | 0.0033 | 0.0018 | 0.0589 | 0.0279 | 0.0178 | 0.0180 | 0.0078 | 0.0060 | 0.0051 | 0.0246 |
| 2085 | 0.0114 | 0.0030 | 0.0017 | 0.0531 | 0.0200 | 0.0142 | 0.0163 | 0.0071 | 0.0048 | 0.0045 | 0.0237 |
| 2090 | 0.0106 | 0.0028 | 0.0015 | 0.0489 | 0.0144 | 0.0120 | 0.0155 | 0.0067 | 0.0040 | 0.0041 | 0.0234 |
| 2095 | 0.0099 | 0.0027 | 0.0014 | 0.0456 | 0.0105 | 0.0106 | 0.0151 | 0.0066 | 0.0034 | 0.0039 | 0.0233 |
| 2100 | 0.0095 | 0.0025 | 0.0012 | 0.0431 | 0.0077 | 0.0097 | 0.0149 | 0.0065 | 0.0031 | 0.0038 | 0.0233 |
| 2105 | 0.0091 | 0.0024 | 0.0010 | 0.0411 | 0.0057 | 0.0090 | 0.0148 | 0.0064 | 0.0028 | 0.0037 | 0.0233 |
| 2110 | 0.0089 | 0.0024 | 0.0009 | 0.0395 | 0.0042 | 0.0085 | 0.0147 | 0.0064 | 0.0026 | 0.0037 | 0.0233 |
| 2115 | 0.0087 | 0.0023 | 0.0007 | 0.0383 | 0.0032 | 0.0081 | 0.0147 | 0.0064 | 0.0024 | 0.0036 | 0.0233 |
| 2120 | 0.0085 | 0.0023 | 0.0006 | 0.0373 | 0.0024 | 0.0079 | 0.0147 | 0.0064 | 0.0023 | 0.0036 | 0.0233 |
| 2125 | 0.0084 | 0.0022 | 0.0005 | 0.0365 | 0.0018 | 0.0077 | 0.0147 | 0.0064 | 0.0022 | 0.0036 | 0.0233 |
| 2130 | 0.0083 | 0.0022 | 0.0004 | 0.0358 | 0.0014 | 0.0075 | 0.0146 | 0.0064 | 0.0022 | 0.0036 | 0.0233 |
| 2135 | 0.0082 | 0.0022 | 0.0003 | 0.0353 | 0.0011 | 0.0074 | 0.0146 | 0.0064 | 0.0021 | 0.0036 | 0.0233 |
| 2140 | 0.0082 | 0.0022 | 0.0002 | 0.0348 | 0.0008 | 0.0073 | 0.0146 | 0.0064 | 0.0021 | 0.0036 | 0.0233 |
| 2145 | 0.0081 | 0.0022 | 0.0001 | 0.0344 | 0.0006 | 0.0073 | 0.0146 | 0.0064 | 0.0020 | 0.0036 | 0.0233 |
| 2150 | 0.0081 | 0.0022 | 0.0001 | 0.0342 | 0.0005 | 0.0072 | 0.0146 | 0.0064 | 0.0020 | 0.0035 | 0.0233 |
| 2155 | 0.0081 | 0.0021 | 0.0001 | 0.0339 | 0.0004 | 0.0072 | 0.0146 | 0.0064 | 0.0020 | 0.0035 | 0.0233 |
| 2160 | 0.0081 | 0.0021 | 0.0000 | 0.0337 | 0.0003 | 0.0072 | 0.0146 | 0.0064 | 0.0020 | 0.0035 | 0.0233 |
| 2165 | 0.0080 | 0.0021 | 0.0000 | 0.0335 | 0.0002 | 0.0071 | 0.0146 | 0.0064 | 0.0020 | 0.0035 | 0.0233 |
| 2170 | 0.0080 | 0.0021 | 0.0000 | 0.0334 | 0.0002 | 0.0071 | 0.0146 | 0.0064 | 0.0020 | 0.0035 | 0.0233 |
| 2175 | 0.0080 | 0.0021 | 0.0000 | 0.0333 | 0.0002 | 0.0071 | 0.0146 | 0.0064 | 0.0019 | 0.0035 | 0.0233 |
| 2180 | 0.0080 | 0.0021 | 0.0000 | 0.0332 | 0.0001 | 0.0071 | 0.0146 | 0.0064 | 0.0019 | 0.0035 | 0.0233 |
| 2185 | 0.0080 | 0.0021 | 0.0000 | 0.0331 | 0.0001 | 0.0071 | 0.0146 | 0.0064 | 0.0019 | 0.0035 | 0.0233 |
| 2190 | 0.0080 | 0.0021 | 0.0000 | 0.0331 | 0.0001 | 0.0071 | 0.0146 | 0.0064 | 0.0019 | 0.0035 | 0.0233 |
| 2195 | 0.0080 | 0.0021 | 0.0000 | 0.0330 | 0.0001 | 0.0071 | 0.0146 | 0.0064 | 0.0019 | 0.0035 | 0.0233 |
| 2200 | 0.0080 | 0.0021 | 0.0000 | 0.0330 | 0.0001 | 0.0071 | 0.0146 | 0.0064 | 0.0019 | 0.0035 | 0.0233 |

Table 12: Sulfur emission intensity  $\sigma_{j,t}^{aa}$

|      | USA    | EUR    | JPN    | AUS    | FSU    | CHN    | IND    | SEA    | LAM    | MEN    | AFR    |
|------|--------|--------|--------|--------|--------|--------|--------|--------|--------|--------|--------|
| 2005 | 0.0811 | 0.0263 | 0.0136 | 0.4524 | 0.6188 | 0.8744 | 0.5183 | 0.2250 | 0.2409 | 0.1669 | 0.3769 |
| 2010 | 0.0703 | 0.0230 | 0.0130 | 0.3884 | 0.5211 | 0.7304 | 0.5117 | 0.2222 | 0.2171 | 0.1388 | 0.3301 |
| 2015 | 0.0658 | 0.0213 | 0.0121 | 0.3430 | 0.4727 | 0.6722 | 0.5544 | 0.2407 | 0.2136 | 0.1249 | 0.3101 |
| 2020 | 0.0628 | 0.0199 | 0.0109 | 0.3105 | 0.4517 | 0.6360 | 0.6054 | 0.2628 | 0.2201 | 0.1180 | 0.3479 |
| 2025 | 0.0531 | 0.0164 | 0.0094 | 0.2487 | 0.3500 | 0.5394 | 0.5905 | 0.2564 | 0.2102 | 0.1030 | 0.3869 |
| 2030 | 0.0494 | 0.0153 | 0.0077 | 0.2345 | 0.2946 | 0.4813 | 0.5419 | 0.2353 | 0.1930 | 0.0893 | 0.3628 |
| 2035 | 0.0417 | 0.0130 | 0.0061 | 0.1992 | 0.2302 | 0.4190 | 0.4855 | 0.2108 | 0.1714 | 0.0764 | 0.3366 |
| 2040 | 0.0346 | 0.0107 | 0.0046 | 0.1652 | 0.1793 | 0.3662 | 0.4370 | 0.1897 | 0.1521 | 0.0661 | 0.3154 |
| 2045 | 0.0295 | 0.0091 | 0.0037 | 0.1402 | 0.1454 | 0.3219 | 0.3959 | 0.1719 | 0.1354 | 0.0578 | 0.2979 |
| 2050 | 0.0255 | 0.0078 | 0.0032 | 0.1204 | 0.1206 | 0.2813 | 0.3567 | 0.1549 | 0.1196 | 0.0503 | 0.2798 |
| 2055 | 0.0225 | 0.0067 | 0.0028 | 0.1064 | 0.0920 | 0.2210 | 0.2677 | 0.1162 | 0.0912 | 0.0435 | 0.2290 |
| 2060 | 0.0195 | 0.0056 | 0.0025 | 0.0919 | 0.0704 | 0.1720 | 0.1964 | 0.0853 | 0.0681 | 0.0368 | 0.1849 |
| 2065 | 0.0175 | 0.0049 | 0.0023 | 0.0824 | 0.0571 | 0.1405 | 0.1497 | 0.0650 | 0.0529 | 0.0323 | 0.1563 |
| 2070 | 0.0151 | 0.0041 | 0.0021 | 0.0712 | 0.0451 | 0.1113 | 0.1096 | 0.0476 | 0.0395 | 0.0273 | 0.1277 |
| 2075 | 0.0141 | 0.0037 | 0.0020 | 0.0663 | 0.0390 | 0.0958 | 0.0865 | 0.0375 | 0.0319 | 0.0249 | 0.1131 |
| 2080 | 0.0125 | 0.0033 | 0.0018 | 0.0584 | 0.0277 | 0.0710 | 0.0719 | 0.0312 | 0.0239 | 0.0204 | 0.0985 |
| 2085 | 0.0113 | 0.0030 | 0.0017 | 0.0528 | 0.0198 | 0.0553 | 0.0635 | 0.0276 | 0.0185 | 0.0175 | 0.0921 |
| 2090 | 0.0105 | 0.0028 | 0.0015 | 0.0485 | 0.0143 | 0.0451 | 0.0582 | 0.0253 | 0.0149 | 0.0155 | 0.0877 |
| 2095 | 0.0099 | 0.0026 | 0.0013 | 0.0453 | 0.0104 | 0.0373 | 0.0531 | 0.0230 | 0.0121 | 0.0138 | 0.0818 |
| 2100 | 0.0094 | 0.0025 | 0.0012 | 0.0428 | 0.0077 | 0.0306 | 0.0473 | 0.0205 | 0.0097 | 0.0120 | 0.0739 |
| 2105 | 0.0091 | 0.0024 | 0.0010 | 0.0408 | 0.0057 | 0.0247 | 0.0407 | 0.0177 | 0.0077 | 0.0102 | 0.0641 |
| 2110 | 0.0088 | 0.0024 | 0.0009 | 0.0392 | 0.0042 | 0.0193 | 0.0335 | 0.0145 | 0.0059 | 0.0083 | 0.0530 |
| 2115 | 0.0086 | 0.0023 | 0.0007 | 0.0380 | 0.0032 | 0.0145 | 0.0262 | 0.0114 | 0.0044 | 0.0065 | 0.0416 |
| 2120 | 0.0085 | 0.0023 | 0.0006 | 0.0370 | 0.0024 | 0.0115 | 0.0214 | 0.0093 | 0.0034 | 0.0052 | 0.0339 |
| 2125 | 0.0083 | 0.0022 | 0.0005 | 0.0362 | 0.0018 | 0.0097 | 0.0185 | 0.0080 | 0.0028 | 0.0045 | 0.0294 |
| 2130 | 0.0083 | 0.0022 | 0.0004 | 0.0355 | 0.0014 | 0.0086 | 0.0168 | 0.0073 | 0.0025 | 0.0041 | 0.0266 |
| 2135 | 0.0082 | 0.0022 | 0.0003 | 0.0350 | 0.0011 | 0.0080 | 0.0157 | 0.0068 | 0.0023 | 0.0038 | 0.0250 |
| 2140 | 0.0081 | 0.0022 | 0.0002 | 0.0346 | 0.0008 | 0.0076 | 0.0151 | 0.0066 | 0.0021 | 0.0037 | 0.0240 |
| 2145 | 0.0081 | 0.0021 | 0.0001 | 0.0342 | 0.0006 | 0.0073 | 0.0148 | 0.0064 | 0.0021 | 0.0036 | 0.0235 |
| 2150 | 0.0080 | 0.0021 | 0.0001 | 0.0339 | 0.0005 | 0.0072 | 0.0146 | 0.0063 | 0.0020 | 0.0035 | 0.0232 |
| 2155 | 0.0080 | 0.0021 | 0.0001 | 0.0337 | 0.0004 | 0.0072 | 0.0146 | 0.0063 | 0.0020 | 0.0035 | 0.0231 |
| 2160 | 0.0080 | 0.0021 | 0.0000 | 0.0335 | 0.0003 | 0.0071 | 0.0145 | 0.0063 | 0.0020 | 0.0035 | 0.0231 |
| 2165 | 0.0080 | 0.0021 | 0.0000 | 0.0333 | 0.0002 | 0.0071 | 0.0145 | 0.0063 | 0.0019 | 0.0035 | 0.0231 |
| 2170 | 0.0080 | 0.0021 | 0.0000 | 0.0332 | 0.0002 | 0.0071 | 0.0145 | 0.0063 | 0.0019 | 0.0035 | 0.0231 |
| 2175 | 0.0080 | 0.0021 | 0.0000 | 0.0330 | 0.0002 | 0.0071 | 0.0145 | 0.0063 | 0.0019 | 0.0035 | 0.0231 |
| 2180 | 0.0079 | 0.0021 | 0.0000 | 0.0330 | 0.0001 | 0.0071 | 0.0145 | 0.0063 | 0.0019 | 0.0035 | 0.0231 |
| 2185 | 0.0079 | 0.0021 | 0.0000 | 0.0329 | 0.0001 | 0.0070 | 0.0145 | 0.0063 | 0.0019 | 0.0035 | 0.0231 |
| 2190 | 0.0079 | 0.0021 | 0.0000 | 0.0328 | 0.0001 | 0.0070 | 0.0145 | 0.0063 | 0.0019 | 0.0035 | 0.0231 |
| 2195 | 0.0079 | 0.0021 | 0.0000 | 0.0328 | 0.0001 | 0.0070 | 0.0145 | 0.0063 | 0.0019 | 0.0035 | 0.0231 |
| 2200 | 0.0079 | 0.0021 | 0.0000 | 0.0327 | 0.0001 | 0.0070 | 0.0145 | 0.0063 | 0.0019 | 0.0035 | 0.0231 |

Table 13: Cross-emission intensity  $\sigma_{j,t}^{ac}$
